# Supplementary material for: Categorical versus continuous circulating tumor cell enumeration as early surrogate marker for therapy response and prognosis during docetaxel therapy in metastatic prostate cancer patients
Source: PubMed Central journal article supplement (PMC4459665; doi:10.1186/s12885-015-1478-4), 2015-06-09
Supplement: 12885_2015_1478_MOESM2_ESM.pdf [file 12885_2015_1478_MOESM2_ESM.pdf]

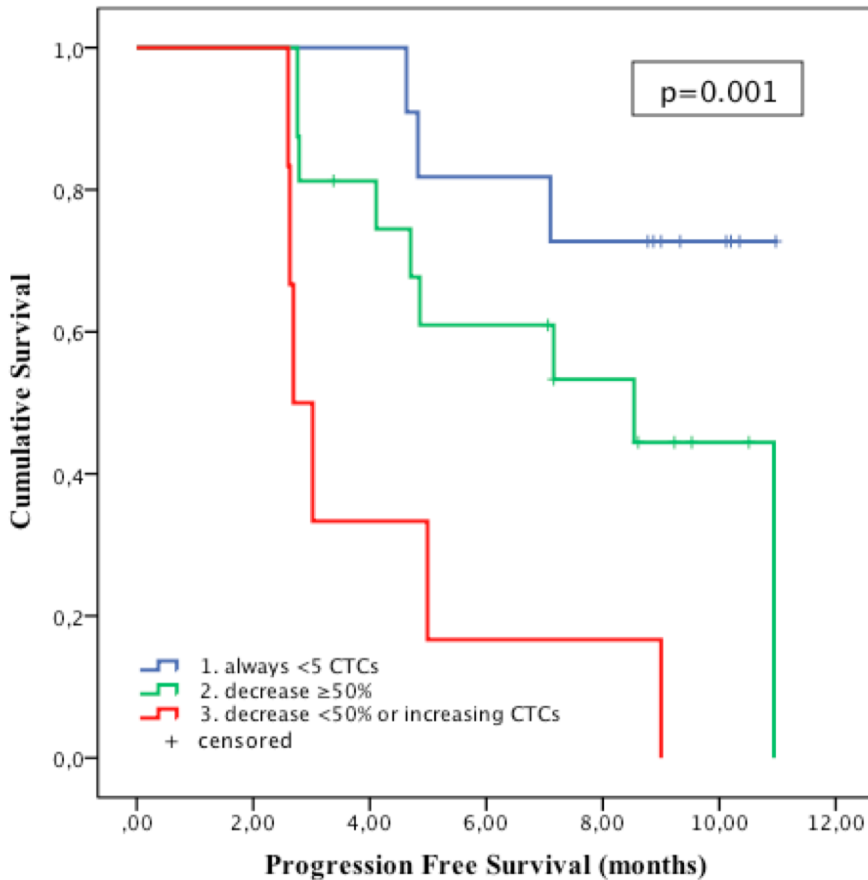

**Additional file 2:** Kaplan Meier analyses for progression free survival in dependency of early CTC-dynamics relative to a CTC-count decrease of  $\geq 50\%$  for the interval from baseline ( $q_0$ ) to the end of the first cycle docetaxel ( $q_1$ ).

| Groups  | CTC-counts                  | Patients, n | PFS, months | 95%CI    | p              |
|---------|-----------------------------|-------------|-------------|----------|----------------|
| Group 1 | always <5                   | 11          | n.a.        | n.a.     | 1 vs. 2: 0.1   |
| Group 2 | decrease $\geq 50\%$        | 16          | 8.5         | 2.6-14.5 | 1 vs. 3: 0.001 |
| Group 3 | decrease <50% or increasing | 6           | 2.7         | 2.2-3.2  | 2 vs. 3: 0.01  |
