# Supplementary material for: Categorical versus continuous circulating tumor cell enumeration as early surrogate marker for therapy response and prognosis during docetaxel therapy in metastatic prostate cancer patients
Source: PubMed Central journal article supplement (PMC4459665; doi:10.1186/s12885-015-1478-4), 2015-06-09
Supplement: 12885_2015_1478_MOESM3_ESM.pdf [file 12885_2015_1478_MOESM3_ESM.pdf]

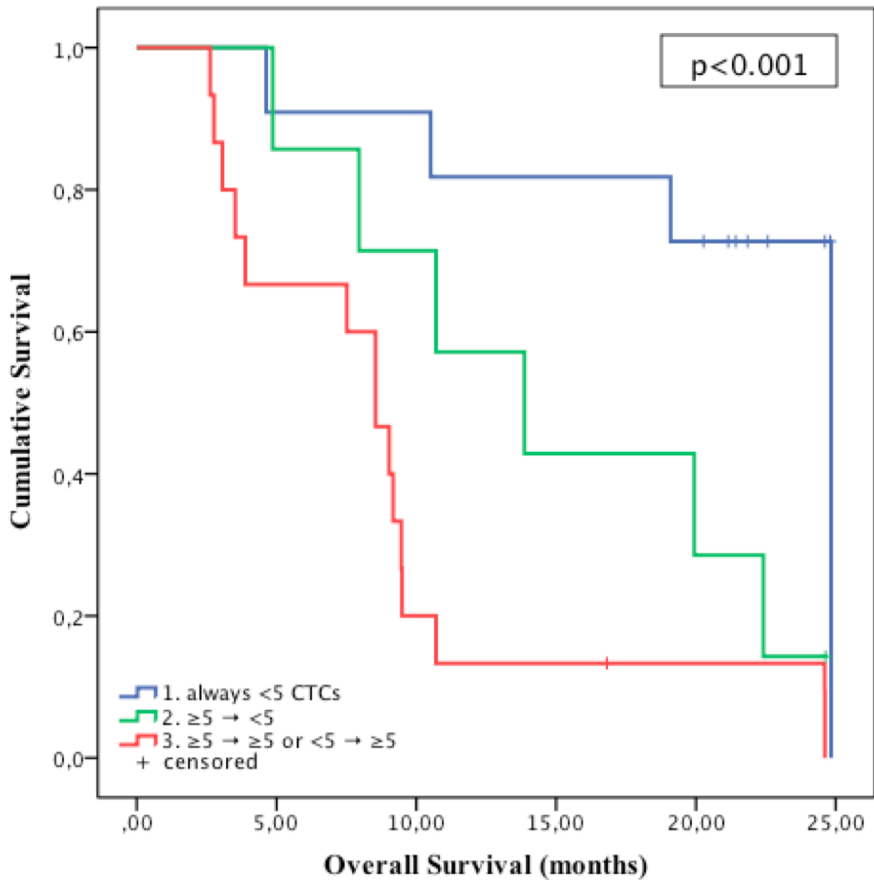

**Additional file 3:** Kaplan Meier analyses for overall survival (OS) according to CTC-dynamics relative to a threshold of 5 CTCs ( $<5$  vs.  $\geq 5$ ) for the interval from baseline (q0) to the end of the first cycle docetaxel (q1).

| Groups  | CTC-counts                                             | Patients, n | OS, months | 95%CI    | p                 |
|---------|--------------------------------------------------------|-------------|------------|----------|-------------------|
| Group 1 | always $<5$                                            | 11          | 24.8       | n.a.     | 1 vs. 2: 0.03     |
| Group 2 | $\geq 5 \rightarrow <5$                                | 7           | 13.9       | 5.8-21.9 | 1 vs. 3: $<0.001$ |
| Group 3 | $\geq 5 \rightarrow \geq 5$ or $<5 \rightarrow \geq 5$ | 15          | 8.5        | 6.6-10.5 | 2 vs. 3: 0.11     |
