# Supplementary material for: Categorical versus continuous circulating tumor cell enumeration as early surrogate marker for therapy response and prognosis during docetaxel therapy in metastatic prostate cancer patients
Source: PubMed Central journal article supplement (PMC4459665; doi:10.1186/s12885-015-1478-4), 2015-06-09
Supplement: 12885_2015_1478_MOESM4_ESM.pdf [file 12885_2015_1478_MOESM4_ESM.pdf]

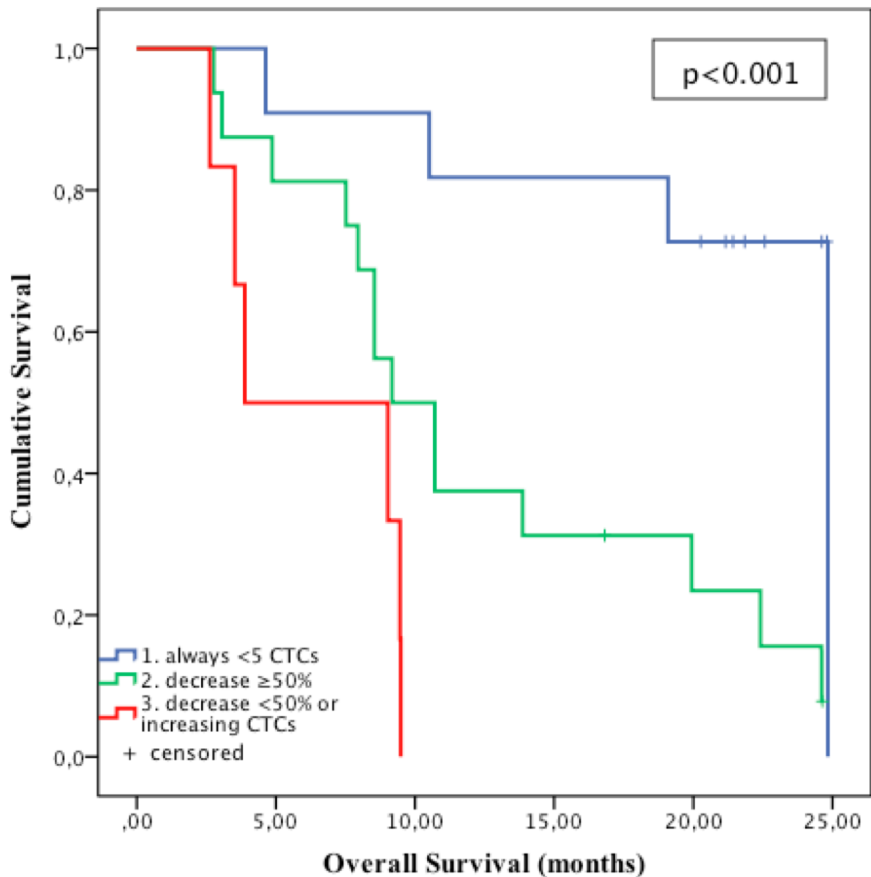

**Additional file 4:** Kaplan Meier analyses for overall survival (OS) according to CTC-dynamics relative to a CTC-count decrease of  $\geq 50\%$  for the interval from baseline (q0) to the end of the first cycle docetaxel (q1).

| Groups  | CTC-counts                  | Patients, n | OS, months | 95%CI    | p               |
|---------|-----------------------------|-------------|------------|----------|-----------------|
| Group 1 | always <5                   | 11          | 24.8       | n.a.     | 1 vs. 2: 0.004  |
| Group 2 | decrease $\geq 50\%$        | 16          | 9.2        | 6.3-12.0 | 1 vs. 3: <0.001 |
| Group 3 | decrease <50% or increasing | 6           | 3.9        | 0.0-10.5 | 2 vs. 3: 0.046  |
