# Supplementary material for: Categorical versus continuous circulating tumor cell enumeration as early surrogate marker for therapy response and prognosis during docetaxel therapy in metastatic prostate cancer patients
Source: Springer Nature journal article supplement (doi:10.1186/s12885-015-1478-4), 2015-06-08
Supplement: MOESM1 [file 9744742]

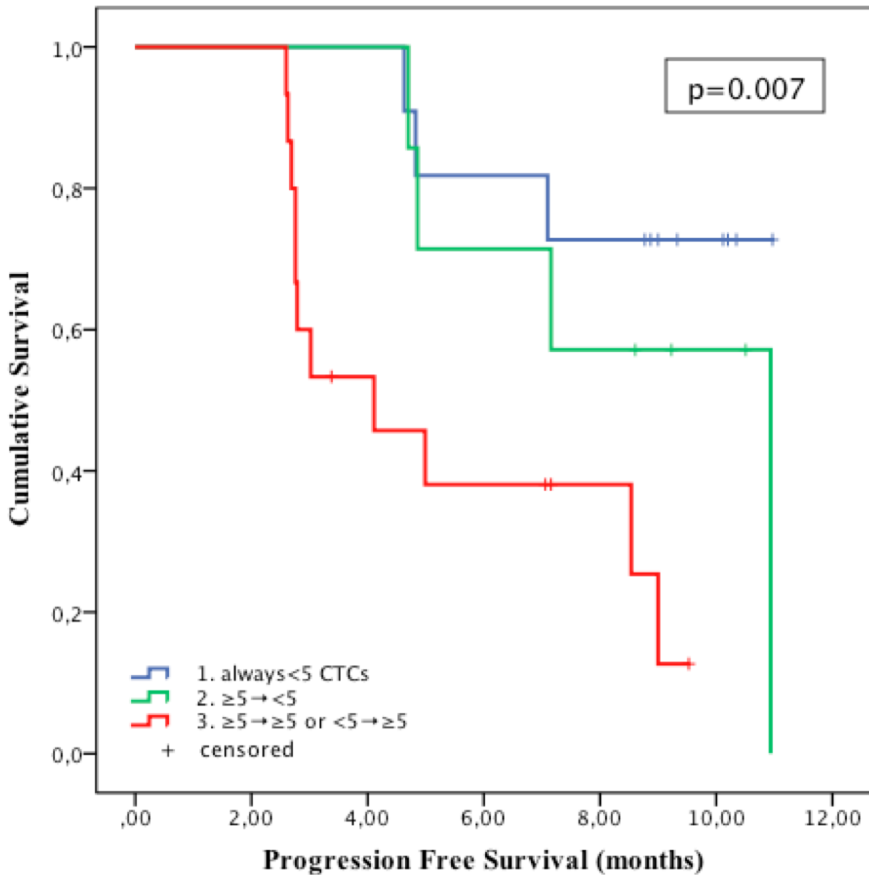

**Additional file 1:** Kaplan Meier analyses for progression free survival in dependency of early CTC-dynamics relative to the threshold of 5 CTCs (<5 vs.  $\geq 5$ ) for the interval from baseline ( $q_0$ ) to the end of the first cycle docetaxel ( $q_1$ ).

| Groups  | CTC-counts                                                 | Patients, n= | PFS, months | 95%CI   | p=             |
|---------|------------------------------------------------------------|--------------|-------------|---------|----------------|
| Group 1 | always <5                                                  | 11           | n.a.        | n.a.    | 1 vs. 2: 0.4   |
| Group 2 | $\geq 5 \rightarrow < 5$                                   | 7            | 10.9        | n.a.    | 1 vs. 3: 0.006 |
| Group 3 | $\geq 5 \rightarrow \geq 5$ or<br>$< 5 \rightarrow \geq 5$ | 15           | 4.1         | 1.5-6.7 | 2 vs. 3: 0.07  |
